# Supplementary material for: PTPN1/2 inhibition promotes muscle stem cell differentiation in Duchenne muscular dystrophy
Source: PubMed Central journal article supplement (PMC11527974; doi:10.26508/lsa.202402831), 2024-10-30

Source Data

Figure 1B

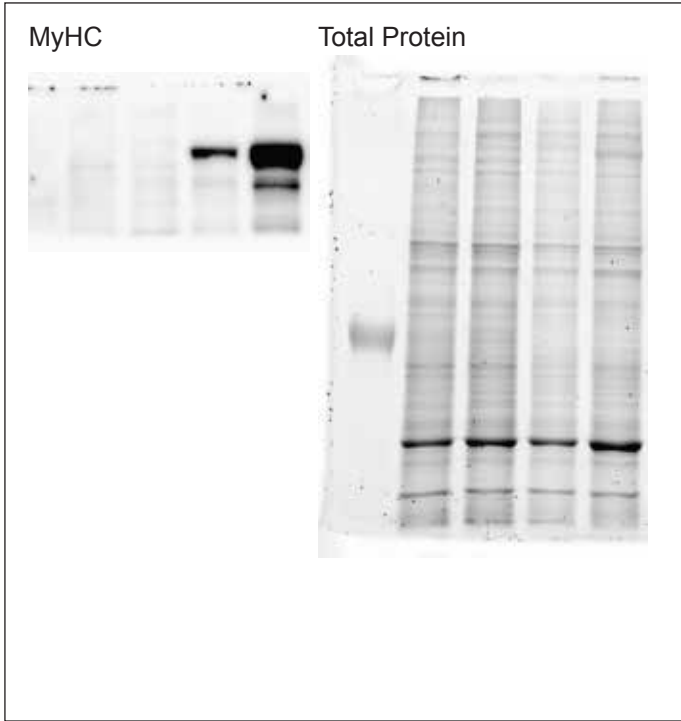

Figure 1B and Figure S1A

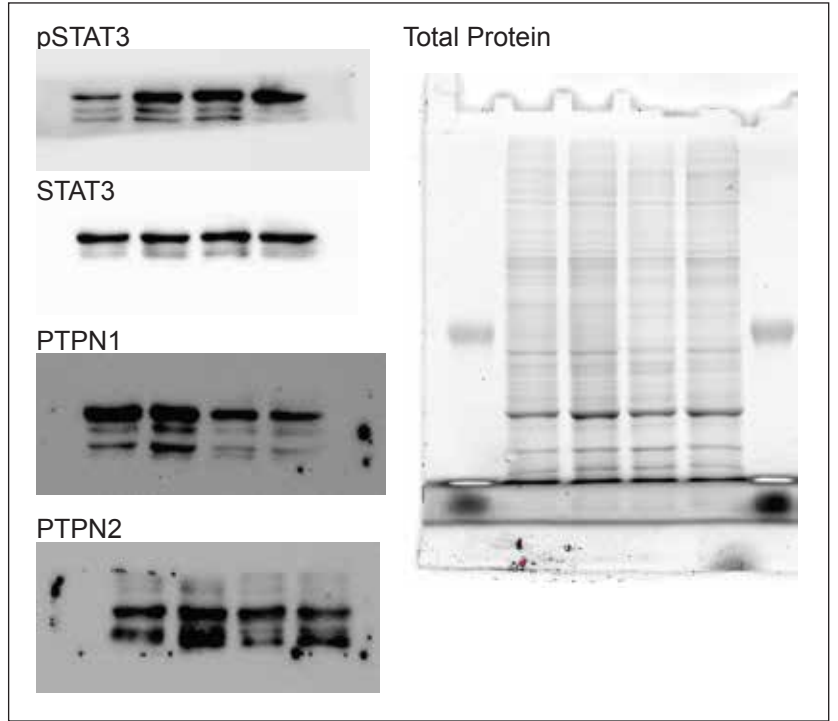

Figure 1E

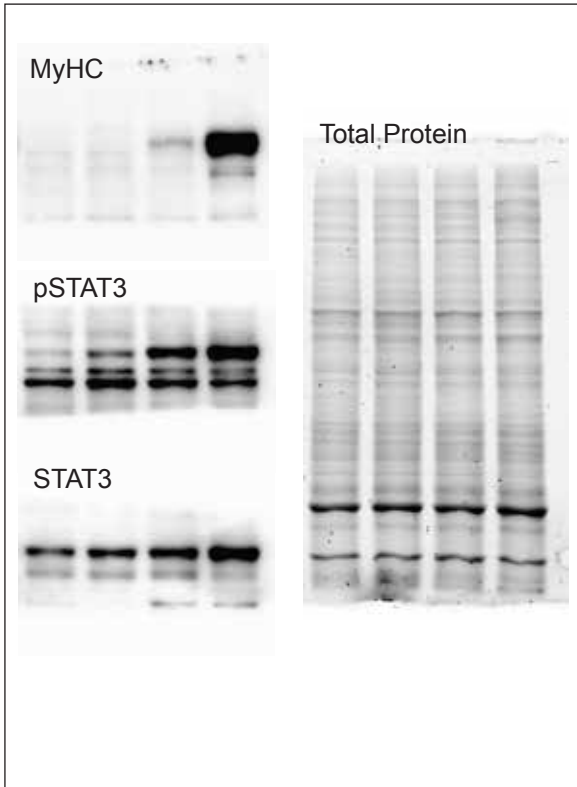

Figure 1E

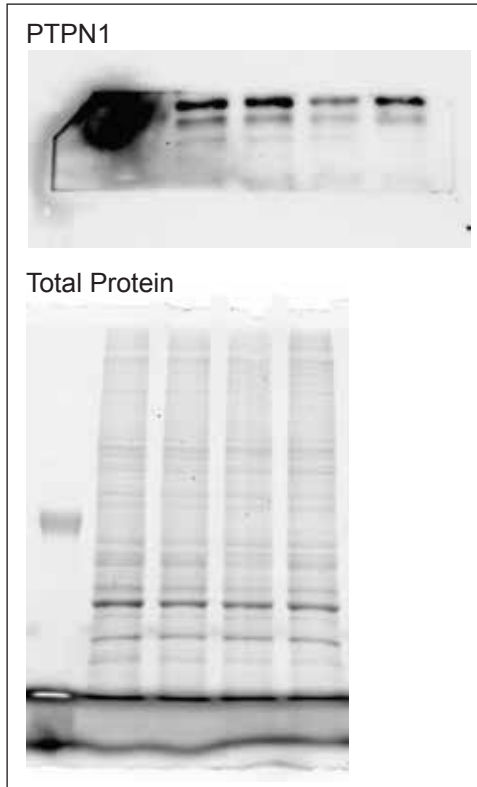

Figure S1B

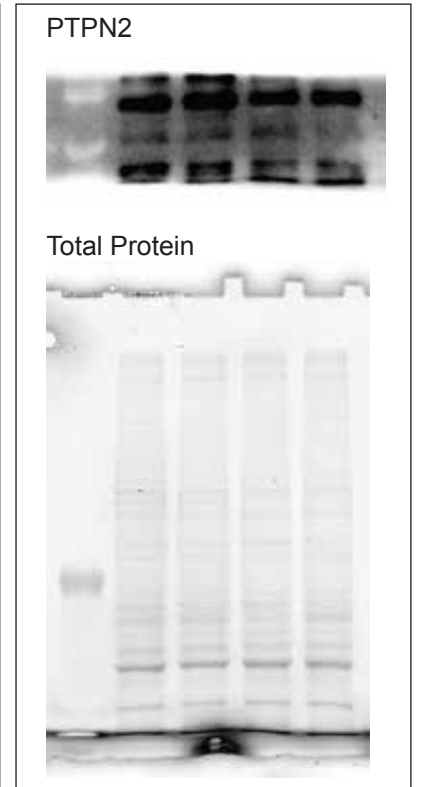

Figure 2C

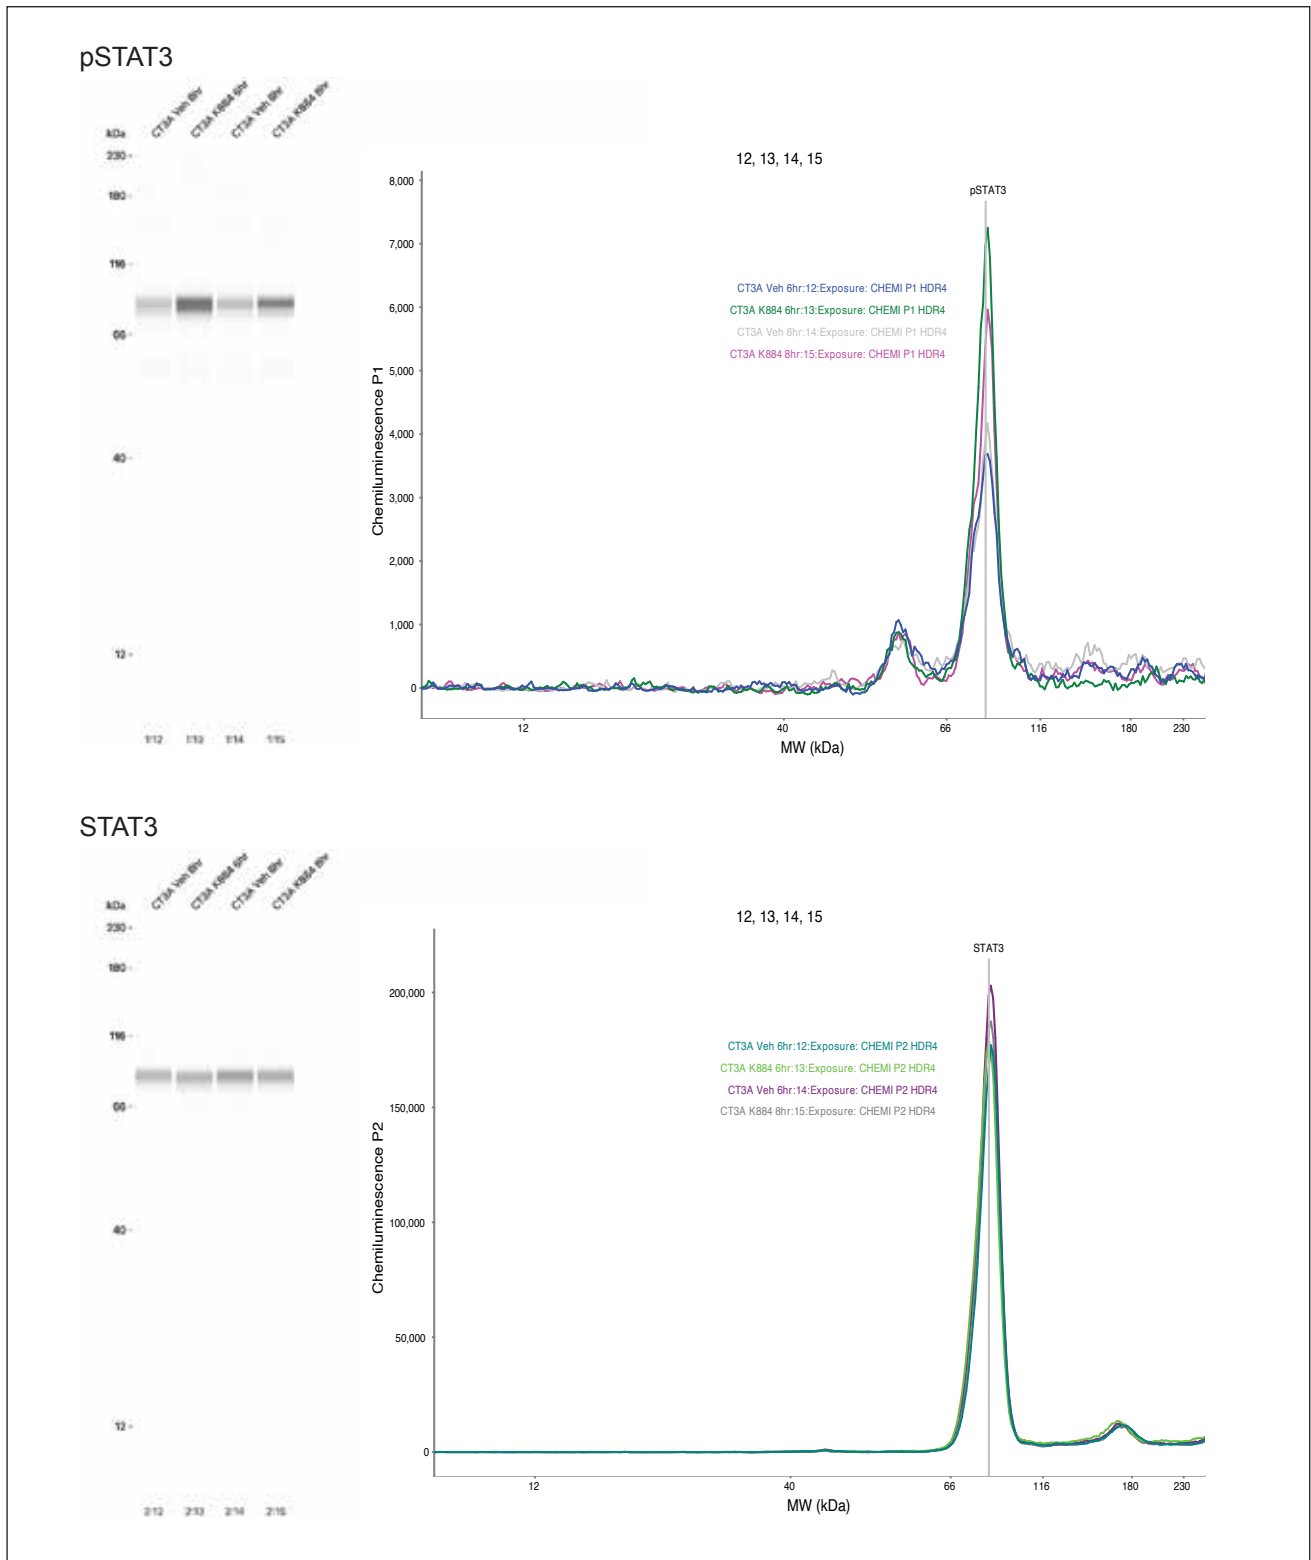

Figure 2D

pSTAT3

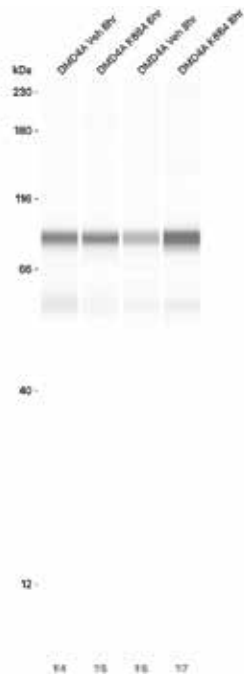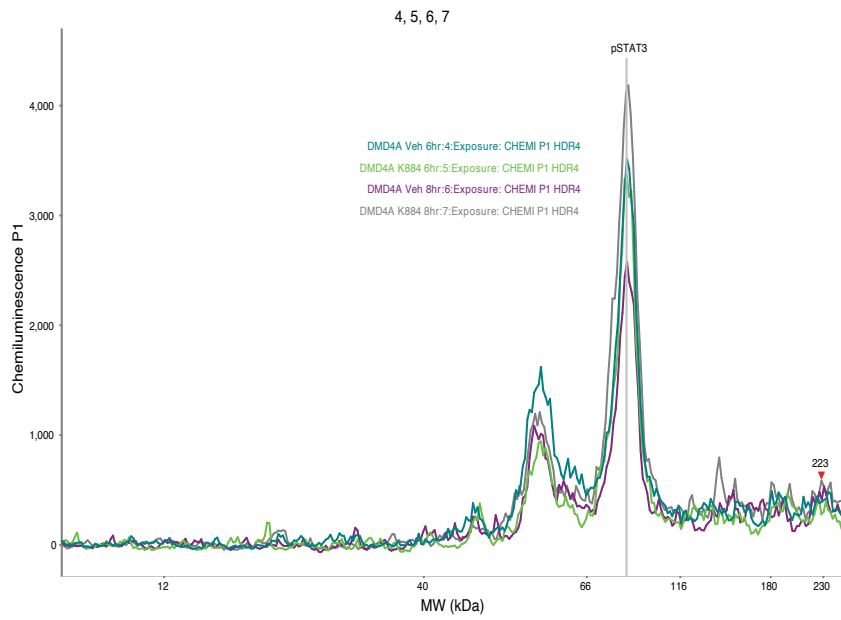

STAT3

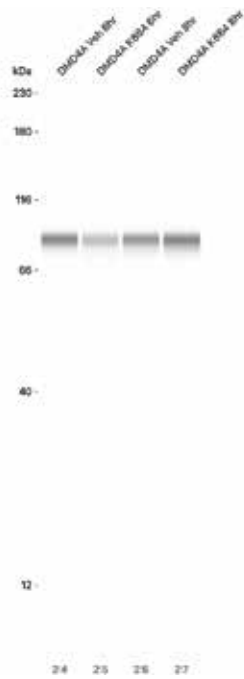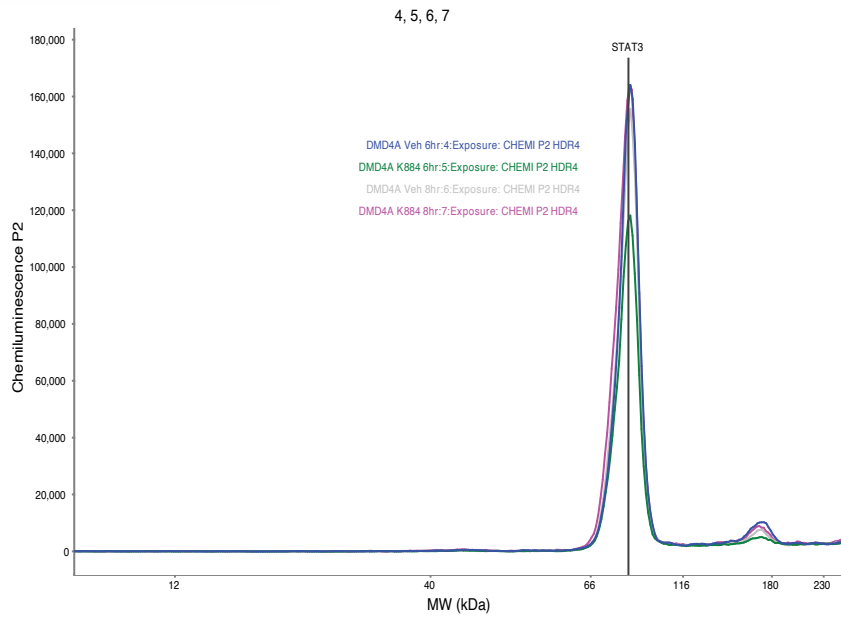

Figure 4A

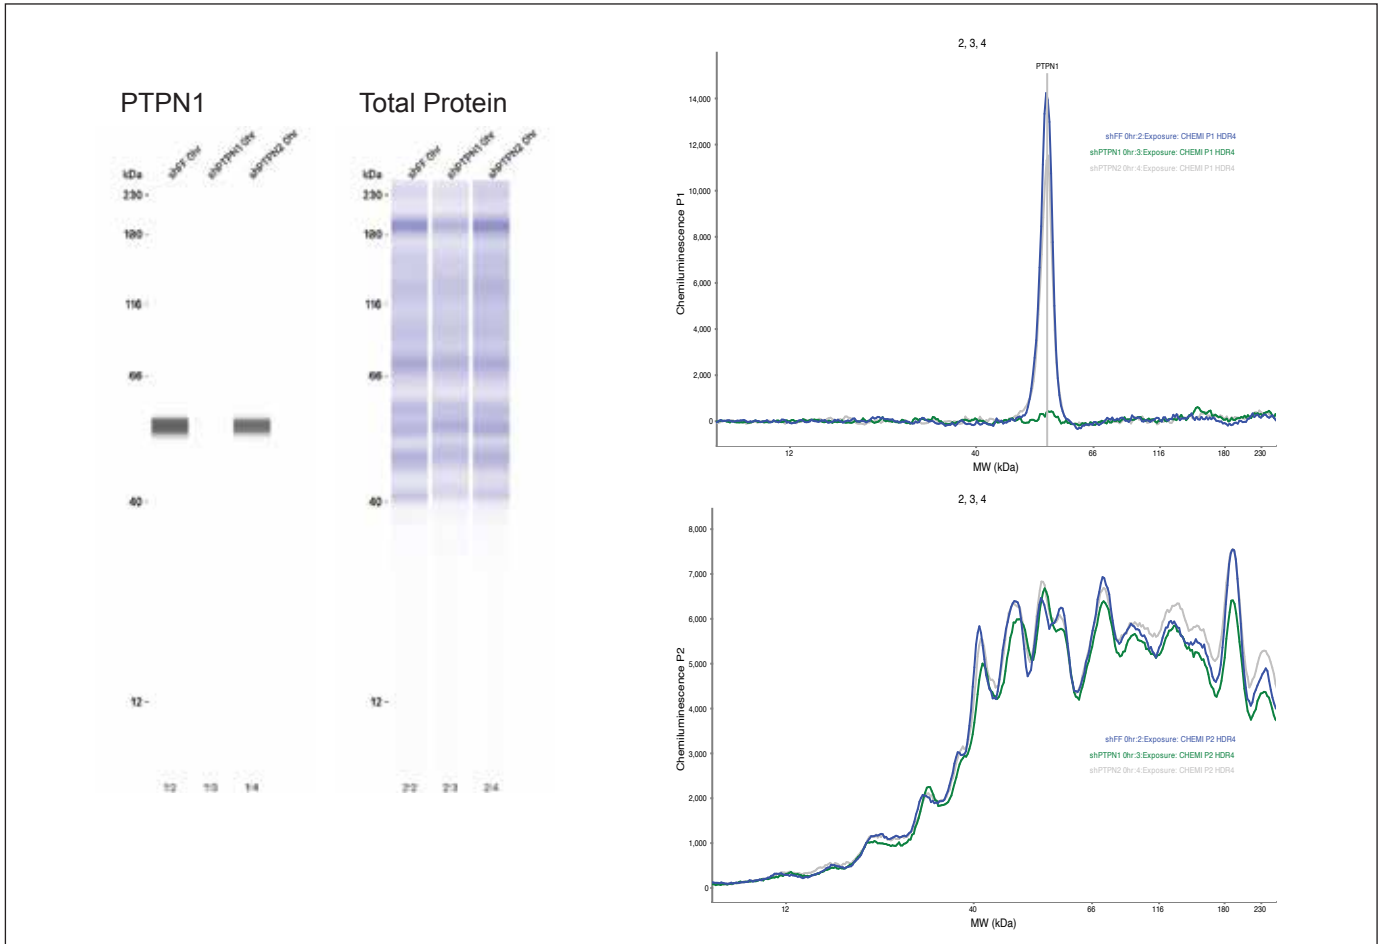

Figure 4B

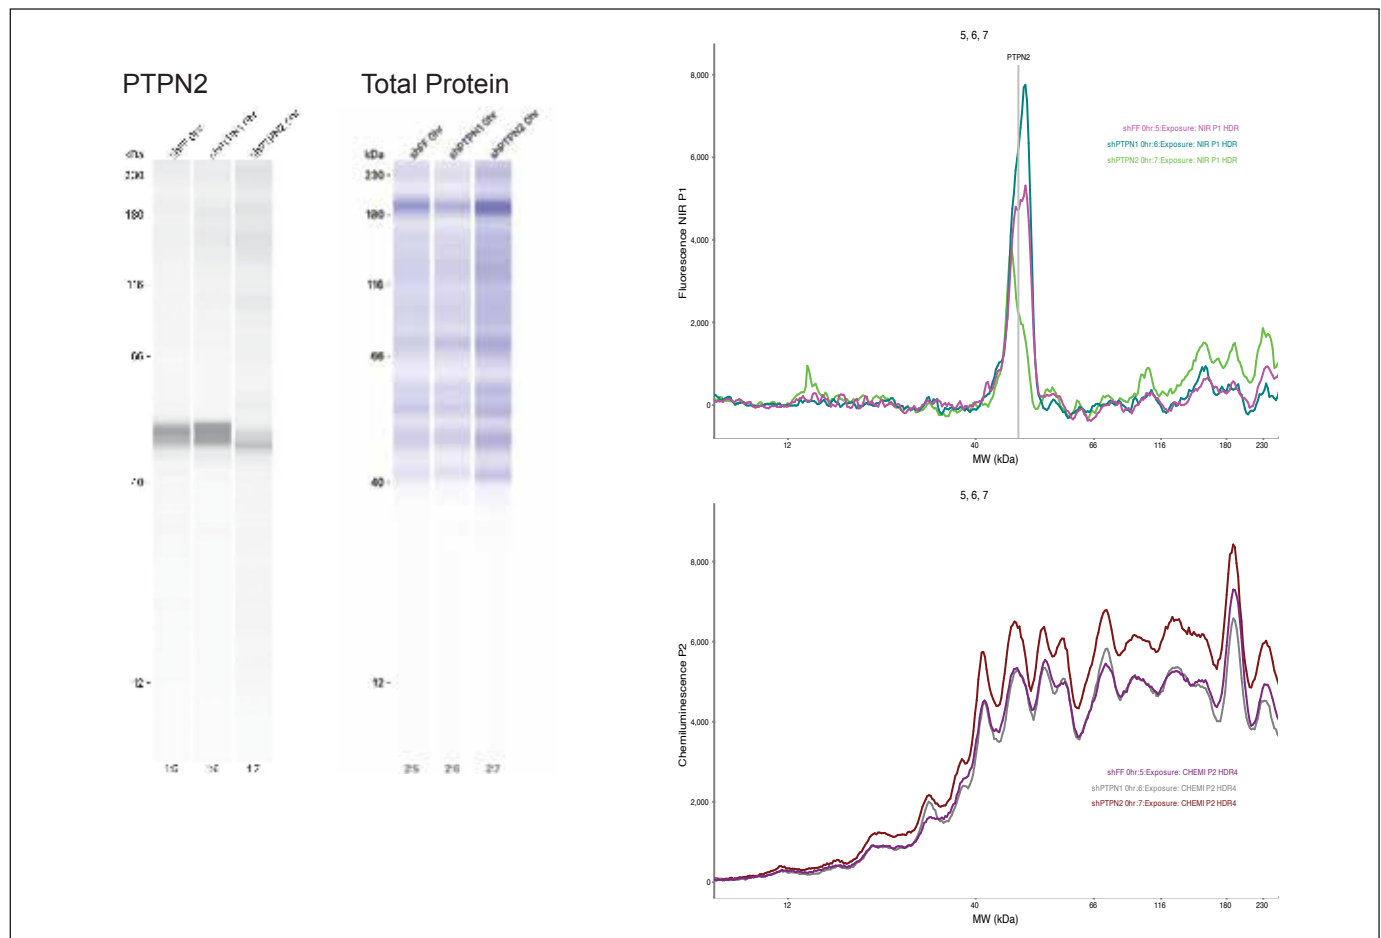

Figure 4C

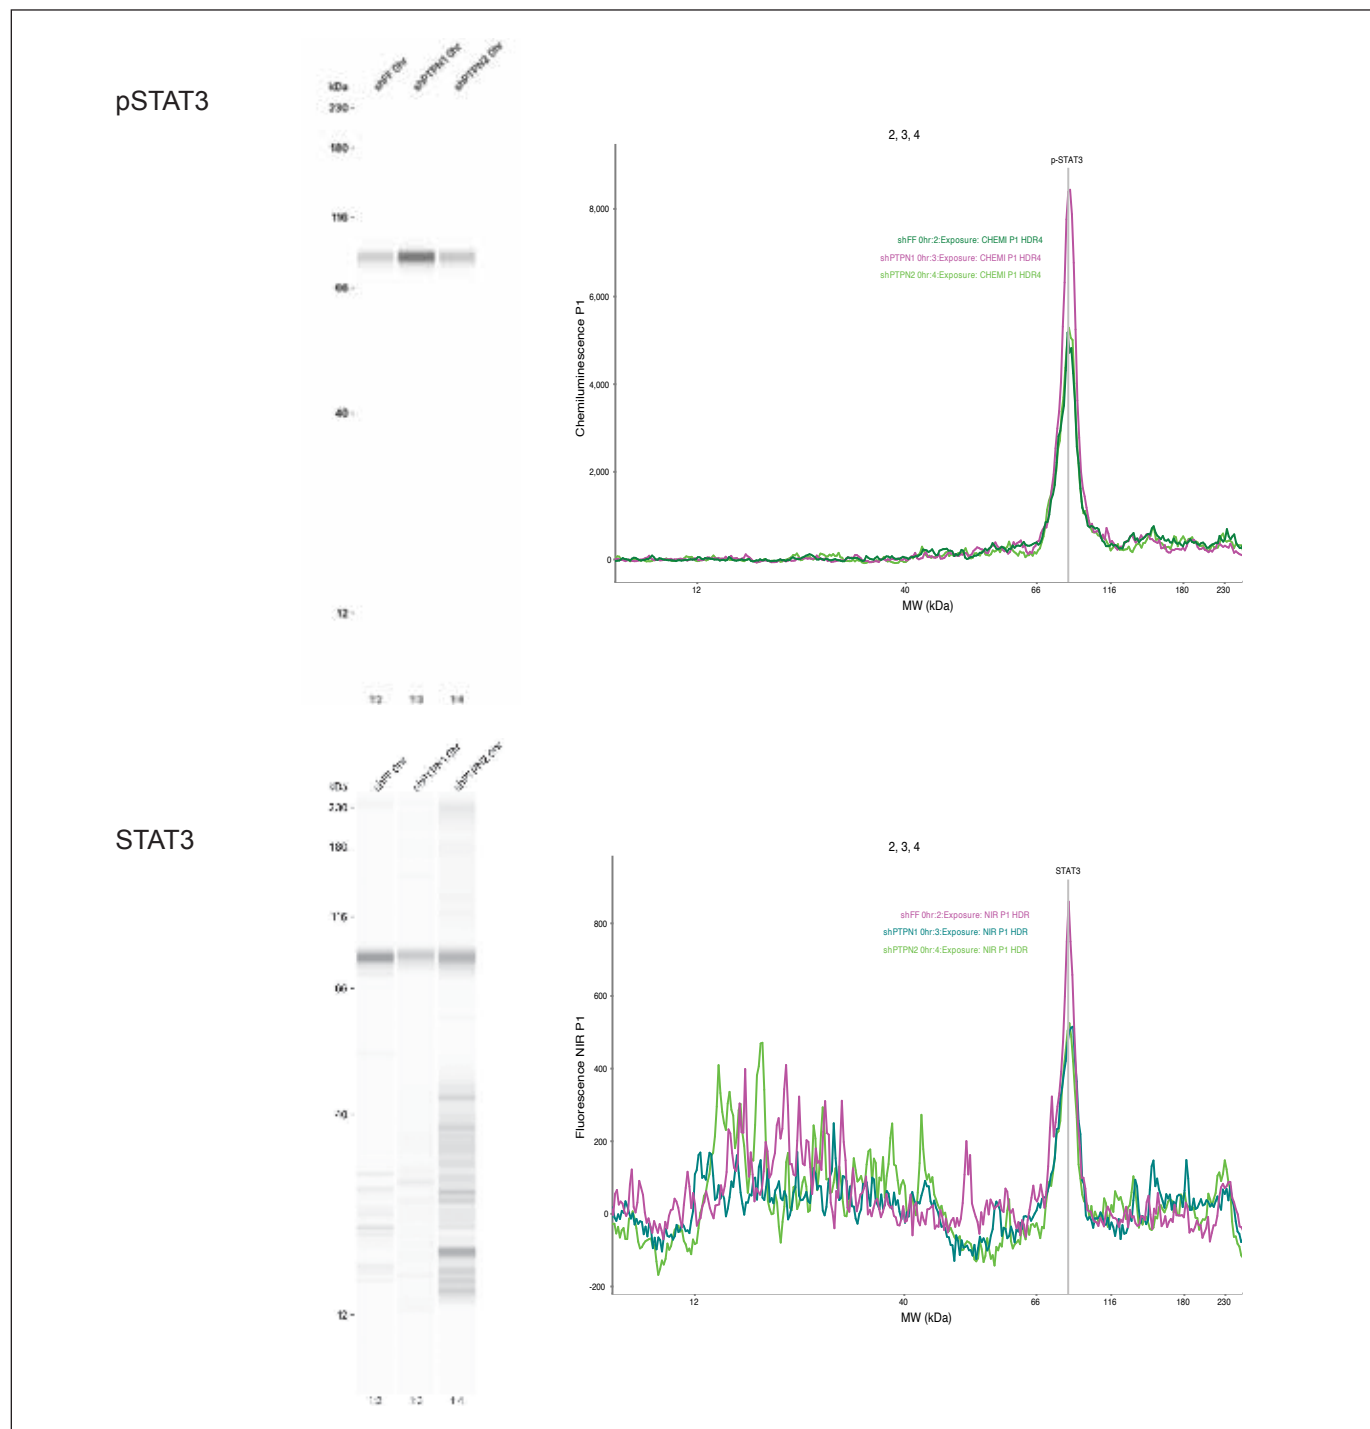

Figure 4D

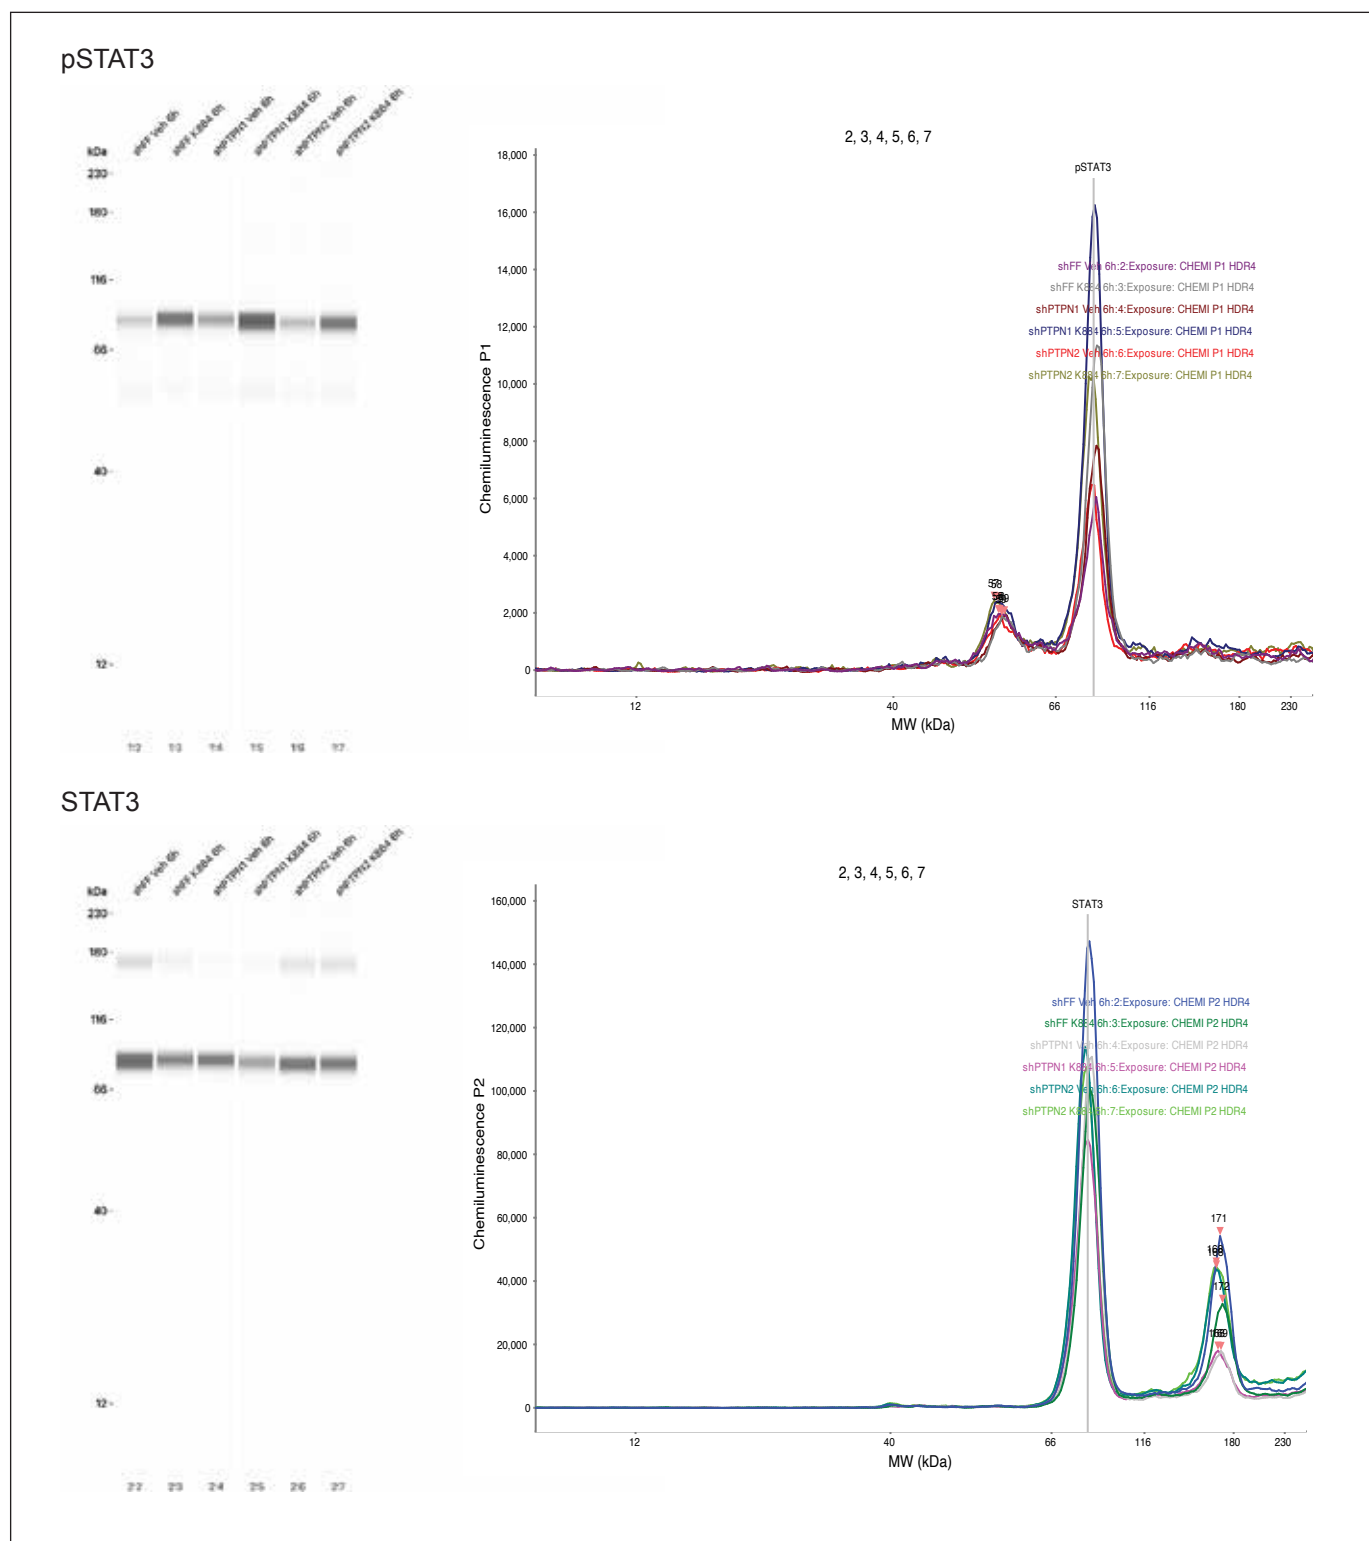

Figure 4E

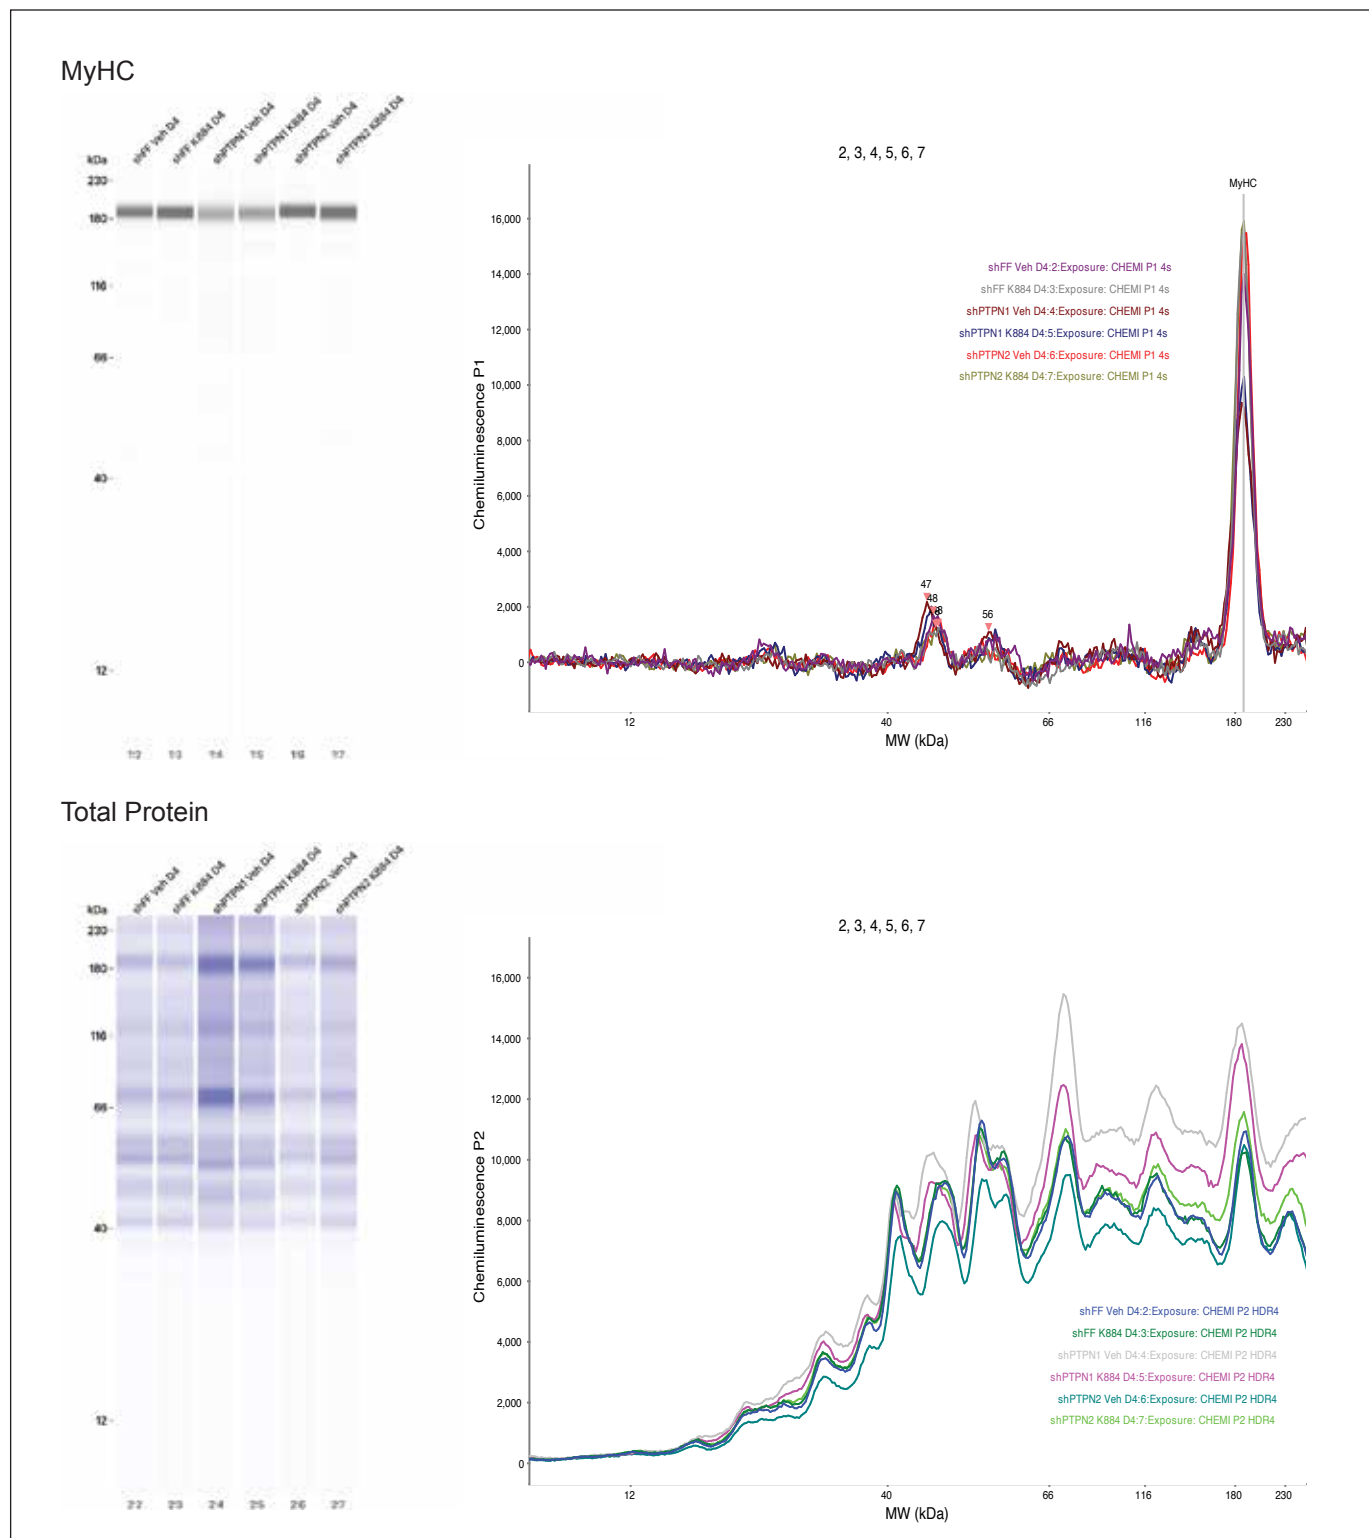

Figure 5C

MyHC

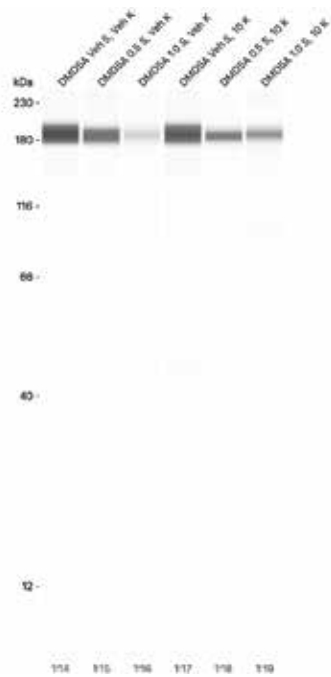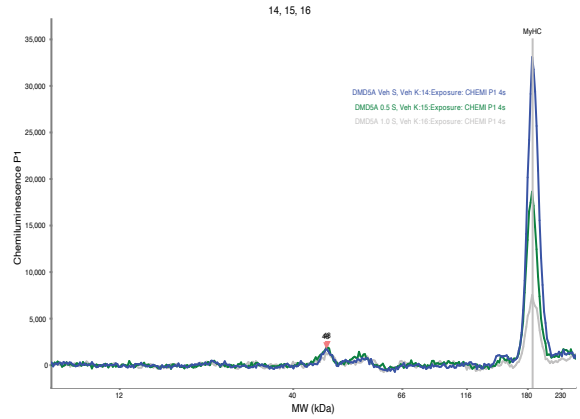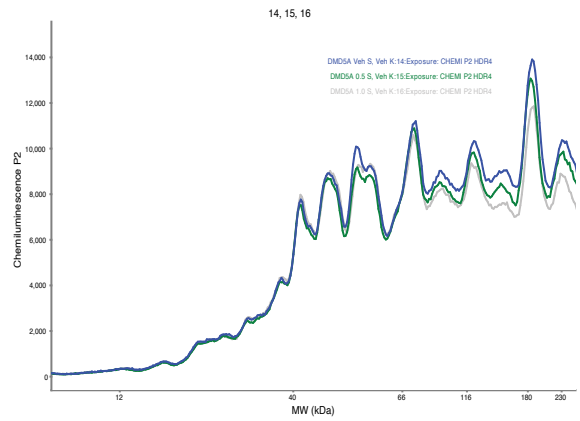

Total Protein

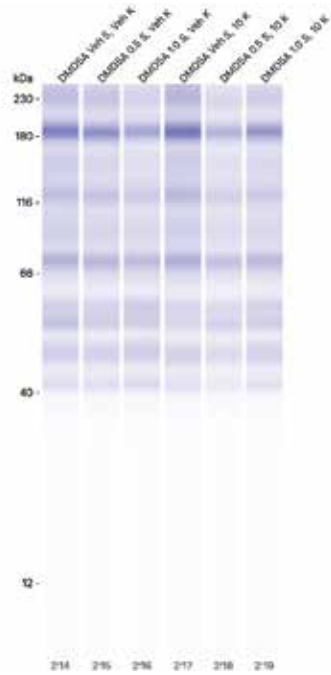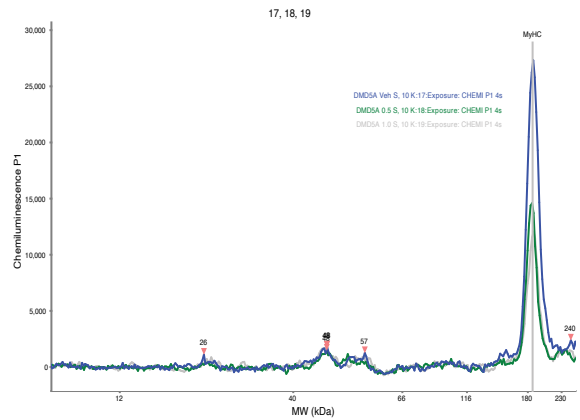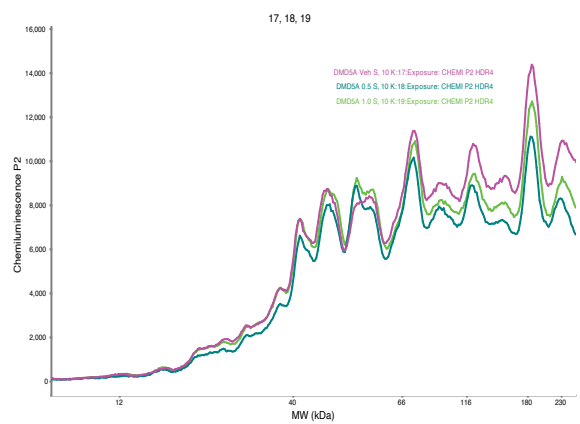



Figure 6B

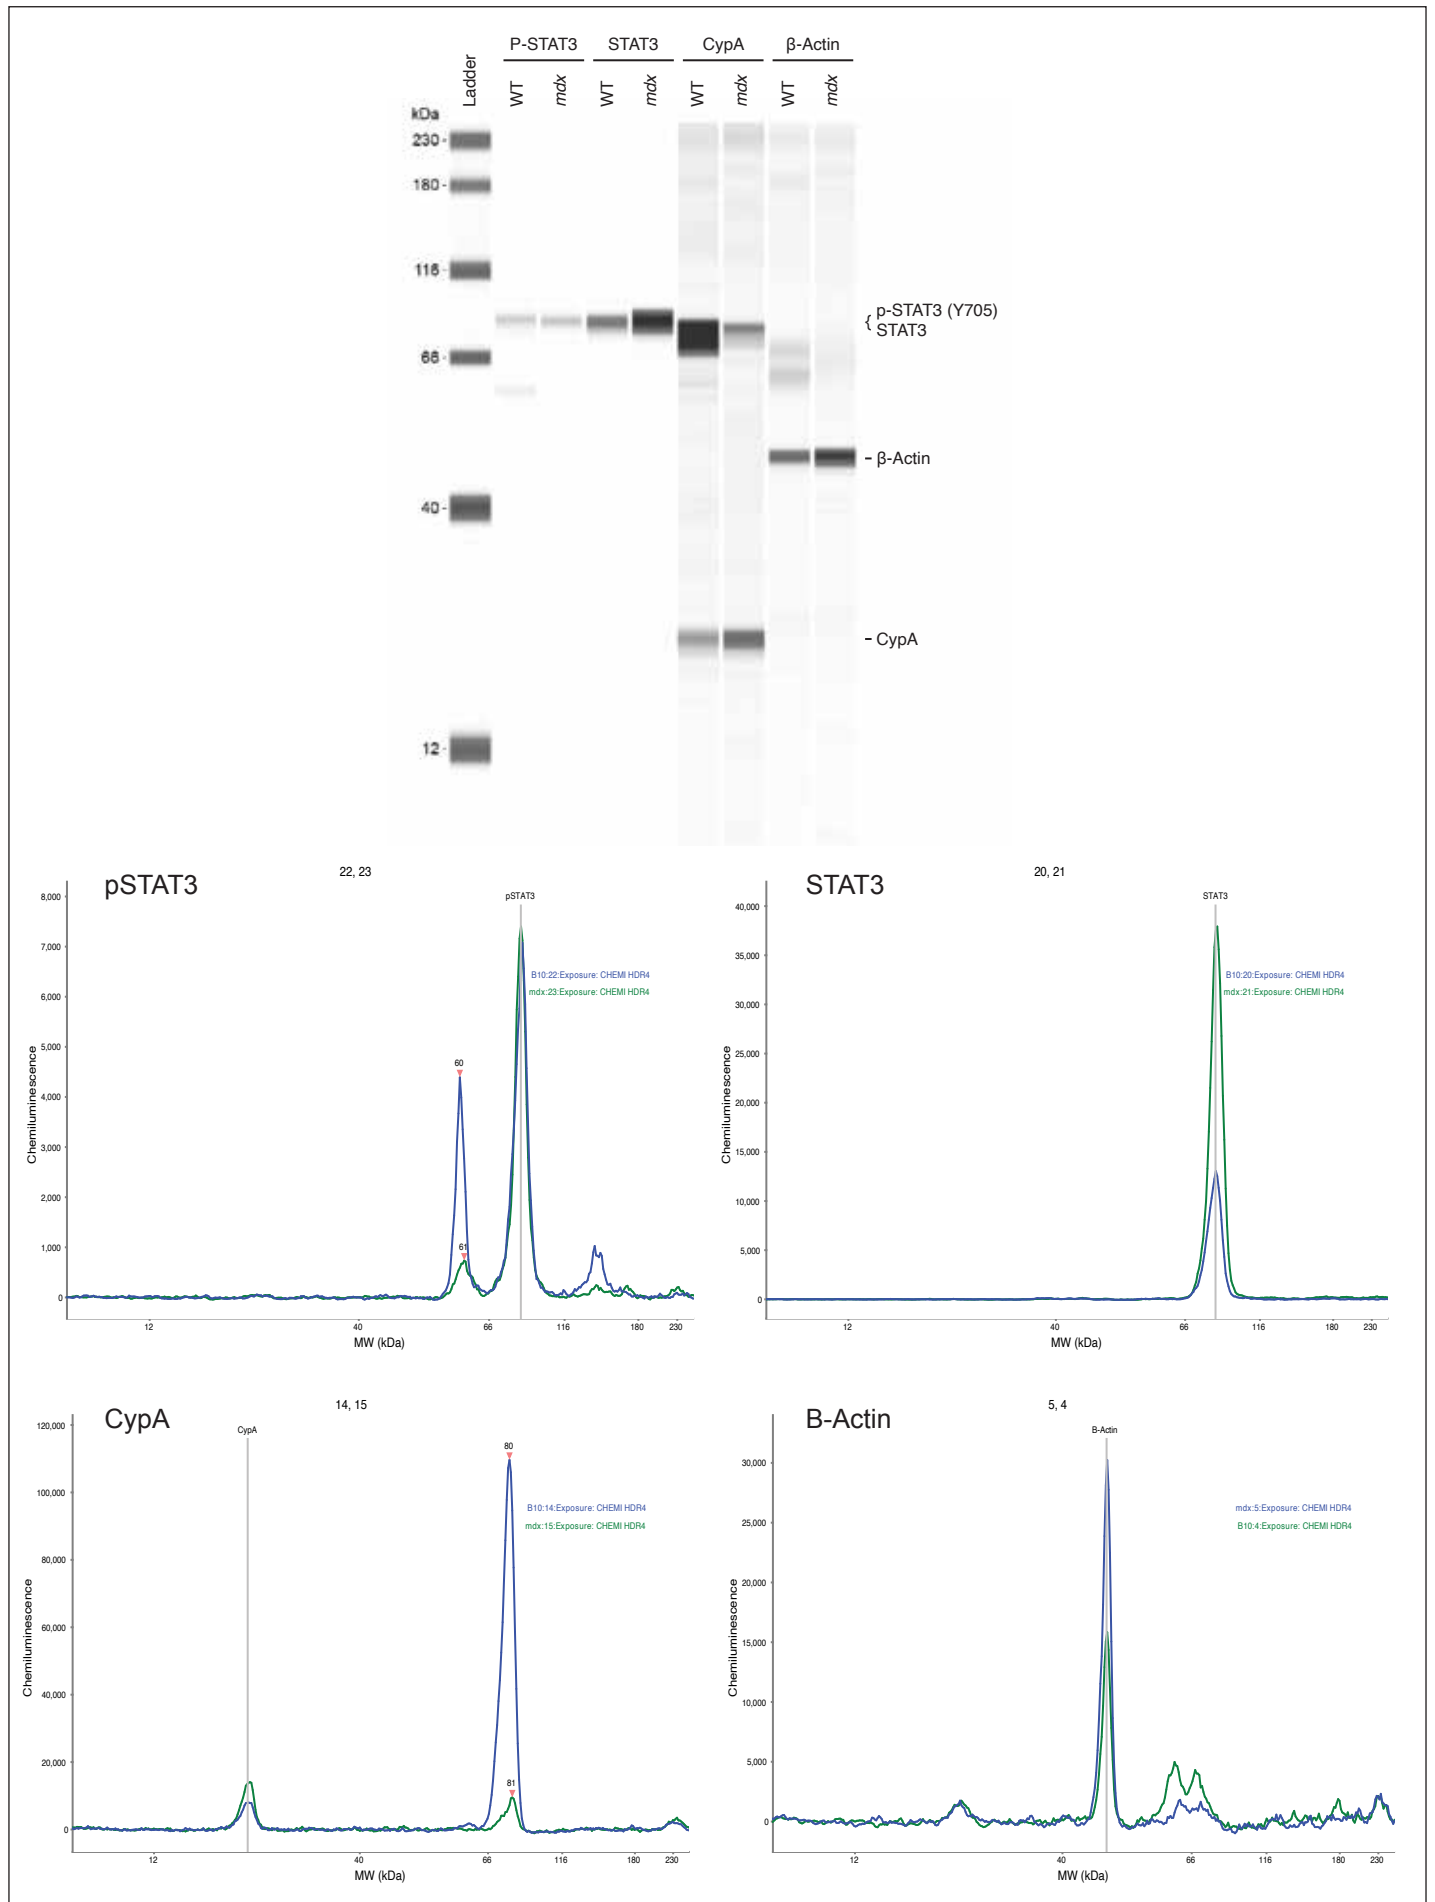

Supplement: LSA-2024-02831_SdataF1_F2_F4_F5_F6.pdf [file LSA-2024-02831_SdataF1_F2_F4_F5_F6.pdf]
